# Supplementary material
Source: Springer Nature journal article supplement (https://www.springermedizin.de/resource/supplementary/12889_2012_4815_MOESM3_ESM.pdf/9490660)

**D**

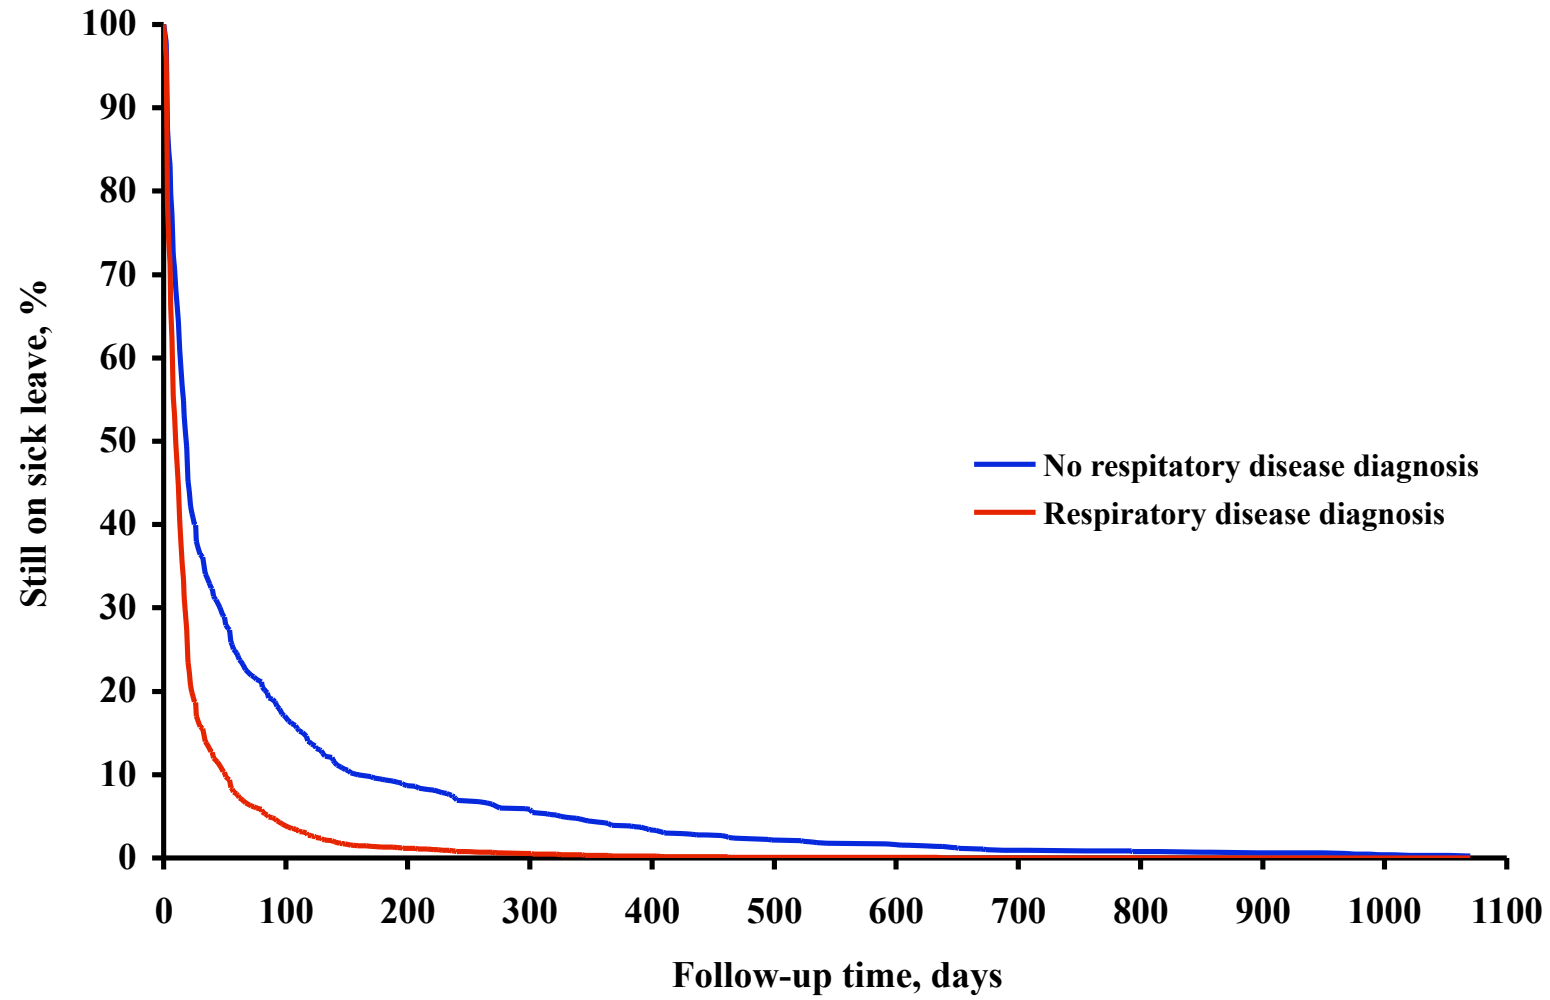

Supplement: MOESM3 [file 9490660]
